# Supplementary material for: Genome-wide analysis of ivermectin response by Onchocerca volvulus reveals that genetic drift and soft selective sweeps contribute to loss of drug sensitivity
Source: PLoS Negl Trop Dis. 2017 Jul 26;11(7):e0005816. doi: 10.1371/journal.pntd.0005816 (PMC5546710; doi:10.1371/journal.pntd.0005816)
Supplement: S5 Table — (XLSX) [file pntd.0005816.s005.xlsx]

## Sheet: Sheet1
S5 Table: Characterisation of genes within QTL clusters that differentiate SOR and GR in either Cameroon or Ghana.
Country	QTL Number	Scaffold	Cluster_start	Cluster_end		Scaffold	Gene_Start	Gene_End	Strand	Locus	inferred by othology	gene_name	transcript_name	Gene description		Cameroon	Ghana
Ghana	1	OVOC.OM1a	650000	690000		OVOC.OM1a	650009	650248	+			WBGene00248505	OVOC11696			0.122125	0.243925
						OVOC.OM1a	656368	659648	+			WBGene00248506	OVOC11697			0.0454546	0
						OVOC.OM1a	663903	665862	+	Ovo-nuo-2		WBGene00248507	OVOC11698	NDUFS3 subunit of mitochondrial complex I.		0.0262269	0.396885
						OVOC.OM1a	666092	668570	-	Ovo-eak-7		WBGene00248508	OVOC11699	Enhancer of AKt-1 null		0	0
						OVOC.OM1a	668804	669314	+			WBGene00248509	OVOC11700			0.0462146	0.334096
						OVOC.OM1a	671016	671618	-	Ovo-hsb-1		WBGene00248510	OVOC11701	Heat Shock Protein		0	0
						OVOC.OM1a	672497	674096	-	Ovo-exos-3		WBGene00248511	OVOC11702	EXOSome (multiexonuclease complex) component		0.0429226	0.249186
						OVOC.OM1a	674428	686597	-			WBGene00248512	OVOC11703			0.203187	0.130772
						OVOC.OM1a	689251	690000	+	Ovo-nud-1		WBGene00248513	OVOC11704	Aspergillus NUclear Division related		0	0
Cameroon	2	OVOC.OM1b	2045000	2100000		OVOC.OM1b	2045001	2046237	+			WBGene00237074	OVOC265			0	0
						OVOC.OM1b	2048479	2059057	-	Ovo-evl-14		WBGene00237075	OVOC266	abnormal Eversion of VuLva		0.364368	0.151814
						OVOC.OM1b	2060685	2069528	-	Ovo-eva-1		WBGene00237076	OVOC267	Enhancer of unc-40 Ventral Axon guidance defects		0.483585	0.0940379
						OVOC.OM1b	2073637	2075355	+			WBGene00237077	OVOC268			0	0.16862
						OVOC.OM1b	2078863	2082312	-			WBGene00237078	OVOC269	Ethanolaminephosphotransferase 1		0.105568	0.147062
						OVOC.OM1b	2083204	2083973	-			WBGene00237079	OVOC270			0.159004	0.121842
						OVOC.OM1b	2094268	2100000	+			WBGene00237080	OVOC271			0.370976	0.0604097
Cameroon	3	OVOC.OM1b	8290000	8310000		OVOC.OM1b	8290001	8296345	-	Ovo-acs-16		WBGene00238031	OVOC1222	fatty Acid CoA Synthetase family		0.400424	0.184124
						OVOC.OM1b	8297863	8307171	-			WBGene00238032	OVOC1223	DNA polymerase		0.41961	0.100318
						OVOC.OM1b	8302361	8302433	-			WBGene00255025	OVOC13036			0	0
Cameroon	4	OVOC.OM1b	19790000	19910000		OVOC.OM1b	19790411	19793158	-			WBGene00239485	OVOC2676			0	0
						OVOC.OM1b	19797421	19809356	+	Ovo-ceh-18		WBGene00239486	OVOC2677	C. Elegans Homeobox		0	0.0642671
						OVOC.OM1b	19812511	19814094	-			WBGene00239487	OVOC2678			0	0
						OVOC.OM1b	19816977	19819053	+			WBGene00239488	OVOC2679			0.05	0
						OVOC.OM1b	19820177	19823719	+			WBGene00239489	OVOC2680			0.054302	0.0973593
						OVOC.OM1b	19824263	19827824	+			WBGene00239490	OVOC2681			0.105784	0.142687
						OVOC.OM1b	19829839	19830563	+			WBGene00239491	OVOC2682			0	0
						OVOC.OM1b	19831346	19835627	-	Ovo-cah-5		WBGene00239492	OVOC2683	Carbonic AnHydrase		0	0
						OVOC.OM1b	19842472	19845615	-	Ovo-obr-2		WBGene00239493	OVOC2684	Oxysterol Binding protein (OSBP) Related		0.482262	0.100928
						OVOC.OM1b	19846477	19850536	+			WBGene00239494	OVOC2685			0	0
						OVOC.OM1b	19854271	19856170	-			WBGene00239495	OVOC2686			0	0
						OVOC.OM1b	19866718	19880177	+	Ovo-crb-1		WBGene00239497	OVOC2688	Drosophila CRumBs homolog		0.603202	0.0968135
						OVOC.OM1b	19881193	19882110	+	cir-1	yes	WBGene00239498	OVOC2689	CIR (transcription factor CBF1 Interacting coRepressor) homolog		0	0
						OVOC.OM1b	19883547	19883619	+			WBGene00255004	OVOC13015			0	0
						OVOC.OM1b	19885138	19885787	-			WBGene00239499	OVOC2690			0.0753231	0.128199
						OVOC.OM1b	19886586	19886658	-			WBGene00255015	OVOC13026			0	0
						OVOC.OM1b	19890703	19897872	-	Ovo-klp-8		WBGene00239500	OVOC2691	Kinesin-Like Protein		0.0753231	0.128199
						OVOC.OM1b	19899250	19899655	-	Ovo-emc-6		WBGene00239501	OVOC2692	ER membrane protein complex subunit 6		0	0
						OVOC.OM1b	19904188	19905386	+			WBGene00239502	OVOC2693			0	0.249109
						OVOC.OM1b	19905466	19906299	+			WBGene00239503	OVOC2694			0.340122	0.0554965
Ghana	5	OVOC.OM1b	21000000	21120000		OVOC.OM1b	21000001	21004746	-			WBGene00239661	OVOC2852			0.0203931	0.376377
						OVOC.OM1b	21000572	21002021	+			WBGene00239664	OVOC2855			0.17845	0.225806
						OVOC.OM1b	21008373	21010939	-			WBGene00239665	OVOC2856			0	0.476707
						OVOC.OM1b	21011728	21012605	-	Ovo-mdt-21		WBGene00239666	OVOC2857	Mediator of RNA polymerase II transcription subunit 21		0.269832	0
						OVOC.OM1b	21012795	21014334	-			WBGene00239667	OVOC2858	Thioredoxin-like protein 4A		0.0459905	0.26625
						OVOC.OM1b	21015536	21015913	+			WBGene00239668	OVOC2859	Cytochrome c oxidase subunit 1		0.0625	0.212067
						OVOC.OM1b	21017817	21019794	+			WBGene00239669	OVOC2860			0	0.131655
						OVOC.OM1b	21021731	21024039	-	pdi-6	yes	WBGene00239670	OVOC2861	Protein Disulfide Isomerase		0.20505	0.283343
						OVOC.OM1b	21026013	21027838	+			WBGene00239671	OVOC2862			0.0311324	0.10365
						OVOC.OM1b	21029147	21032650	-	Ovo-bre-5		WBGene00239672	OVOC2863	Beta-1,3-galactosyltransferase		0.0248464	0.266669
						OVOC.OM1b	21035185	21040709	-	Ovo-tag-147		WBGene00239673	OVOC2864			0.0314526	0.282793
						OVOC.OM1b	21040959	21042334	+			WBGene00239674	OVOC2865			0.0601042	0.264478
						OVOC.OM1b	21043117	21047882	-			WBGene00239675	OVOC2866			0.0797967	0.391927
						OVOC.OM1b	21048858	21049508	-			WBGene00239676	OVOC2867			0.101267	0.298346
						OVOC.OM1b	21052047	21054372	+	tyms-1	yes	WBGene00239677	OVOC2868	Thymidylate synthase		0.199327	0.46185
						OVOC.OM1b	21055671	21058667	+			WBGene00239678	OVOC2869			0.173143	0.299711
						OVOC.OM1b	21068570	21068722	-			WBGene00239679	OVOC2870			0	0
						OVOC.OM1b	21074026	21074655	-			WBGene00239680	OVOC2871			0	0.0502684
						OVOC.OM1b	21082684	21083725	+			WBGene00239681	OVOC2872			0.0607314	0.320472
						OVOC.OM1b	21089184	21095264	+	Ovo-nprl-2		WBGene00239682	OVOC2873	Nitrogen Permease Regulator Like homolog		0.207646	0.181998
						OVOC.OM1b	21098300	21101497	-	Ovo-inx-5		WBGene00239683	OVOC2874	INneXin		0.0374243	0.0886733
						OVOC.OM1b	21103162	21103669	+			WBGene00239684	OVOC2875			0.0422799	0.313834
						OVOC.OM1b	21104169	21104291	-			WBGene00239685	OVOC2876			0.0619137	0.1
						OVOC.OM1b	21105662	21110599	+		yes	WBGene00239686	OVOC2877	WD-repeat protein, putative		0.0737518	0.190838
						OVOC.OM1b	21111074	21115809	+	Ovo-abcf-1		WBGene00239687	OVOC2878	ABC transporter, class F		0.0853505	0.24077
						OVOC.OM1b	21116996	21120000	-			WBGene00239688	OVOC2879	Rho guanine nucleotide exchange factor 3		0.0546489	0.34092
Cameroon	6	OVOC.OM1b	22170000	22230000		OVOC.OM1b	22170001	22177126	+	Ovo-hrpf-2	yes	WBGene00239838	OVOC3029	HnRNP F homolog		0.365348	0.0994996
						OVOC.OM1b	22178539	22181080	+		yes	WBGene00239839	OVOC3030	Probable leucine carboxyl methyltransferase 1		0.378787	0.0550534
						OVOC.OM1b	22182141	22186818	+	C04F5.8	yes	WBGene00239840	OVOC3031	predicted to have tRNA (guanine-N7-)-methyltransferase activity, involved in embryo development		0.372603	0.210515
						OVOC.OM1b	22188198	22200435	-		yes	WBGene00239841	OVOC3032	Alpha-2-macroglobulin domain-containing protein		0.358031	0.105769
						OVOC.OM1b	22202457	22202948	-			WBGene00239842	OVOC3033			0.0629355	0.115607
						OVOC.OM1b	22205940	22208747	-			WBGene00239843	OVOC3034			0.30017	0.100735
						OVOC.OM1b	22214243	22216705	-			WBGene00239844	OVOC3035			0.133333	0.0844639
						OVOC.OM1b	22221112	22230000	-	Ovo-npp-14		WBGene00239845	OVOC3036	Nuclear Pore complex Protein		0.377483	0.127454
Cameroon	7	OVOC.OM1b	22960000	23000000		OVOC.OM1b	22960001	22961441	-			WBGene00239947	OVOC3138			0	0
						OVOC.OM1b	22962860	22965348	-	math-46	yes	WBGene00239948	OVOC3139	MATH (meprin-associated Traf homology) domain containing		0.39877	0.158068
						OVOC.OM1b	22965870	22966547	-			WBGene00239949	OVOC3140			0.0666667	0
						OVOC.OM1b	22966807	22968632	-			WBGene00239950	OVOC3141			0.174214	0.16101
						OVOC.OM1b	22975591	22979701	-	Ovo-mans-4	yes	WBGene00239951	OVOC3142	MAnnoSidase (family 47 glycohydrolase)		0.291189	0.139395
						OVOC.OM1b	22980185	22980428	-			WBGene00239952	OVOC3143			0	0.146718
						OVOC.OM1b	22981890	22987118	-			WBGene00239953	OVOC3144			0.490667	0.179307
						OVOC.OM1b	22984304	22984386	+			WBGene00255006	OVOC13017	tRNA-Leu		0.446475	0.213745
						OVOC.OM1b	22988596	22990747	-			WBGene00239954	OVOC3145			0.374867	0.0465532
						OVOC.OM1b	22990954	22991620	+			WBGene00239955	OVOC3146			0.374867	0.0465532
						OVOC.OM1b	22998697	23000000	-	endu-1	yes	WBGene00239956	OVOC3147	Poly(U)-specific endoribonuclease homolog		0.0359283	0.0672081
Ghana	8	OVOC.OM1b	28230000	28250000		OVOC.OM1b	28237486	28239632	+			WBGene00240580	OVOC3771			0	0
						OVOC.OM1b	28248451	28250000	+			WBGene00240581	OVOC3772			0	0
Cameroon	9	OVOC.OM2	530000	630000		OVOC.OM2	530001	531683	-	Ovo-cha-1		WBGene00240687	OVOC3878	abnormal CHoline Acetyltransferase		0.0156571	0.127214
						OVOC.OM2	533808	535575	-	Ovo-unc-17	yes	WBGene00240688	OVOC3879	acetylcholine transporter		0.844389	0.256888
						OVOC.OM2	535615	541053	-			WBGene00240689	OVOC3880			0.500544	0.261499
						OVOC.OM2	548519	551725	-	Ovo-rsf-1		WBGene00240690	OVOC3881	RASSF (Ras-association domain family) homolog		0	0
						OVOC.OM2	555117	563057	-	Ovo-tax-6		WBGene00240691	OVOC3882	abnormal CHEmotaxis		0	0
						OVOC.OM2	563125	572872	-			WBGene00240692	OVOC3883			0.0476191	0.0645675
						OVOC.OM2	579737	585574	+	Ovo-max-2		WBGene00240693	OVOC3884	Serine/threonine-protein kinase max-2		0	0
						OVOC.OM2	588638	595351	-	Ovo-vha-5		WBGene00240694	OVOC3885	Vacuolar H ATPase		0.189944	0.157112
						OVOC.OM2	601363	604152	+	Ovo-map-1		WBGene00240695	OVOC3886	Methionine AminoPeptidase		0.551326	0.257889
						OVOC.OM2	605512	612739	-	Ovo-tag-77		WBGene00240696	OVOC3887	Rho guanyl-nucleotide exchange factor		0.639577	0.169518
						OVOC.OM2	615042	619157	+			WBGene00240697	OVOC3888			0.640052	0.235895
						OVOC.OM2	623772	624900	+			WBGene00240698	OVOC3889			0.705601	0.183216
						OVOC.OM2	625639	630000	-	Ovo-unc-129		WBGene00240699	OVOC3890	TGF-beta family of secreted growth factor signaling molecules		0.480826	0.421321
Cameroon	10.1	OVOC.OM2	1590000	1620000		OVOC.OM2	1590001	1599433	-			WBGene00240817	OVOC4008	EGF domain-specific O-linked N-acetylglucosamine transferase		0.494294	0.41496
						OVOC.OM2	1592936	1595784	+			WBGene00240816	OVOC4007			0	0
						OVOC.OM2	1601461	1614791	+	Ovo-mtm-5		WBGene00240818	OVOC4009	MTM (myotubularin) family		0.341529	0.498956
						OVOC.OM2	1614859	1618613	+			WBGene00240819	OVOC4010			0	0
						OVOC.OM2	1619146	1620000	-			WBGene00240820	OVOC4011			0	0
						OVOC.OM2	1620293	1624138	+			WBGene00240821	OVOC4012			0.117718	0
						OVOC.OM2	1626546	1628824	+	Ovo-stg-1		WBGene00240822	OVOC4013	STarGazin (mammalian calcium channel) homolog		0	0
						OVOC.OM2	1629420	1642154	-	Ovo-aex-3		WBGene00240823	OVOC4014	ABoc, EXpulsion (defecation) defective		0.177657	0.433925
Ghana	10.2	OVOC.OM2	1580000	1650000		OVOC.OM2	1588360	1599433	-			WBGene00240817	OVOC4008	EGF domain-specific O-linked N-acetylglucosamine transferase		0.494294	0.41496
						OVOC.OM2	1592936	1595784	+			WBGene00240816	OVOC4007			0	0
						OVOC.OM2	1601461	1614791	+	Ovo-mtm-5		WBGene00240818	OVOC4009	MTM (myotubularin) family		0.341529	0.498956
						OVOC.OM2	1614859	1618613	+			WBGene00240819	OVOC4010			0	0
						OVOC.OM2	1619146	1620418	-			WBGene00240820	OVOC4011			0	0
						OVOC.OM2	1620293	1624138	+			WBGene00240821	OVOC4012			0.117718	0
						OVOC.OM2	1626546	1628824	+	Ovo-stg-1		WBGene00240822	OVOC4013	STarGazin (mammalian calcium channel) homolog		0	0
						OVOC.OM2	1629420	1642154	-	Ovo-aex-3		WBGene00240823	OVOC4014	ABoc, EXpulsion (defecation) defective		0.177657	0.433925
Cameroon	11	OVOC.OM2	2400000	2430000		OVOC.OM2	2404298	2419228	-	Ovo-wnk-1		WBGene00240929	OVOC4120	mammalian WNK-type protein kinase homolog		0.439528	0.135984
Cameroon	12	OVOC.OM2	3060000	3080000		OVOC.OM2	3060001	3065271	+			WBGene00241028	OVOC4219			0	0
						OVOC.OM2	3067770	3069272	-			WBGene00241029	OVOC4220			0.412051	0.104889
						OVOC.OM2	3075093	3080000	-	Ovo-rbr-2		WBGene00241030	OVOC4221	RB (Retinoblastoma Binding protein) Related		0.470148	0.160382
Ghana	13	OVOC.OM2	3600000	3710000		OVOC.OM2	3602523	3611190	-	Ovo-klp-11		WBGene00241114	OVOC4305	Kinesin-Like Protein		0.119227	0.339483
						OVOC.OM2	3617728	3622085	-			WBGene00241115	OVOC4306	NAD kinase 2, mitochondrial		0.11593	0.134849
						OVOC.OM2	3625488	3626722	+			WBGene00241116	OVOC4307			0.0816066	0.279365
						OVOC.OM2	3632706	3649505	+	Ovo-unc-31		WBGene00241117	OVOC4308	pleckstrin homology (PH) domain-containing protein		0.107511	0.294137
						OVOC.OM2	3650488	3655085	-		yes	WBGene00241119	OVOC4310	Sodium-dependent glucose transporter 1		0.280718	0.580228
						OVOC.OM2	3659248	3660125	+			WBGene00241120	OVOC4311			0	0
						OVOC.OM2	3663122	3668075	+			WBGene00241121	OVOC4312			0.0909091	0.123194
						OVOC.OM2	3678277	3680866	+	Ovo-sms-1	SphingoMyelin Synthase	WBGene00241122	OVOC4313	SphingoMyelin Synthase		0	0
						OVOC.OM2	3683328	3690529	-			WBGene00241123	OVOC4314			0.082488	0.0755025
						OVOC.OM2	3704409	3710000	+	Ovo-cdh-5	CaDHerin family	WBGene00241124	OVOC4315	CaDHerin family		0.218247	0.0685966
Ghana	14	OVOC.OM2	4590000	4620000		OVOC.OM2	4590001	4590777	-			WBGene00255547	OVOC13511			0.0655603	0.10375
						OVOC.OM2	4590979	4606980	-	Ovo-unc-44	UNCoordinated	WBGene00241240	OVOC4431			0.122908	0.222282
						OVOC.OM2	4610693	4611225	+			WBGene00241241	OVOC4432			0.037037	0
						OVOC.OM2	4613744	4616926	-			WBGene00241242	OVOC4433	Ubiquitin and Zinc finger domain containing protein		0.13923	0.384824
						OVOC.OM2	4618681	4620000	-	Ovo-sfrp-1	yes	WBGene00241243	OVOC4434	Secreted Frizzled-Related Protein		0	0.0476191
Cameroon	15	OVOC.OM2	6110000	6160000		OVOC.OM2	6110305	6113139	+	Ovo-lpr-4		WBGene00241477	OVOC4668	LiPocalin-Related protein		0	0
						OVOC.OM2	6116339	6122519	-	Ovo-tbck-1		WBGene00241478	OVOC4669	TBC Kinase homolog		0	0.109247
						OVOC.OM2	6124182	6124716	+			WBGene00241479	OVOC4670			0.184032	0.06281
						OVOC.OM2	6129659	6134230	+			WBGene00241480	OVOC4671			0	0
						OVOC.OM2	6135991	6136483	+			WBGene00241481	OVOC4672			0	0
						OVOC.OM2	6137870	6145595	+			WBGene00241482	OVOC4673			0	0
						OVOC.OM2	6149493	6150372	+			WBGene00241483	OVOC4674			0	0
						OVOC.OM2	6154347	6156078	-			WBGene00241484	OVOC4675			0	0
						OVOC.OM2	6156478	6157455	-			WBGene00241485	OVOC4676			0	0
Cameroon	16	OVOC.OM2	6410000	6430000		OVOC.OM2	6417623	6417948	-			WBGene00241525	OVOC4716			0.25661	0
						OVOC.OM2	6421038	6430000	+	Ovo-nrfl-1		WBGene00241526	OVOC4717	NHERF (mammalian Na/H Exchange Regulatory Factor) Like		0	0
Ghana	17	OVOC.OM2	7760000	8070000		OVOC.OM2	7760210	7760791	-			WBGene00241741	OVOC4932			0	0
						OVOC.OM2	7763226	7768025	+	Ovo-lgc-47		WBGene00241742	OVOC4933	Ligand-Gated ion Channel		0	0
						OVOC.OM2	7769522	7770779	-			WBGene00241743	OVOC4934			0	0
						OVOC.OM2	7771172	7779064	+	Ovo-kin-2		WBGene00241744	OVOC4935	protein KINase		0	0
						OVOC.OM2	7780045	7786096	-			WBGene00241745	OVOC4936			0	0.128362
						OVOC.OM2	7786951	7789466	+			WBGene00241746	OVOC4937			0	0
						OVOC.OM2	7789931	7793681	-	Ovo-spl-1		WBGene00241747	OVOC4938	Sphingosine Phosphate Lyase		0.0252443	0.330414
						OVOC.OM2	7796507	7800636	+	Ovo-clec-180		WBGene00241748	OVOC4939	C-type LECtin		0.038784	0.276795
						OVOC.OM2	7801777	7817300	-	Ovo-ced-5		WBGene00241749	OVOC4940	CEll Death abnormality		0.123782	0.269921
						OVOC.OM2	7818857	7821816	-	Ovo-pes-8		WBGene00241750	OVOC4941	Patterned Expression Site		0.0777316	0
						OVOC.OM2	7825290	7829393	+			WBGene00241751	OVOC4942			0	0
						OVOC.OM2	7833783	7841115	-			WBGene00241752	OVOC4943	E3 ubiquitin-protein ligase KCMF1		0.0457512	0.215183
						OVOC.OM2	7843386	7844824	+			WBGene00241753	OVOC4944			0.0351605	0.137447
						OVOC.OM2	7846821	7850756	-	Ovo-gly-20		WBGene00241754	OVOC4945	GLYcosylation related		0.126932	0.0880664
						OVOC.OM2	7852361	7855004	-			WBGene00241755	OVOC4946	Nuclear factor related to kappa-B-binding protein		0.0390965	0.376553
						OVOC.OM2	7855195	7860062	+			WBGene00241756	OVOC4947			0	0.109499
						OVOC.OM2	7860224	7866003	+			WBGene00241757	OVOC4948			0.0502455	0.0434783
						OVOC.OM2	7866822	7871892	-			WBGene00241758	OVOC4949			0.037037	0.0852215
						OVOC.OM2	7872893	7876783	-	Ovo-rund-1	yes	WBGene00241759	OVOC4950	RUN Domain containing protein		0.115417	0.115165
						OVOC.OM2	7878302	7878609	+			WBGene00241760	OVOC4951			0	0
						OVOC.OM2	7879199	7883160	+	Ovo-pdi-2		WBGene00241761	OVOC4952	Protein Disulfide Isomerase		0	0.13479
						OVOC.OM2	7885857	7887358	-	Ovo-rhi-1		WBGene00241762	OVOC4953	RHo GDI		0	0
						OVOC.OM2	7888888	7890862	+			WBGene00241763	OVOC4954			0	0
						OVOC.OM2	7891414	7892476	-			WBGene00255416	OVOC13408			0	0.109189
						OVOC.OM2	7892995	7896549	-			WBGene00241764	OVOC4955			0	0
						OVOC.OM2	7897147	7898956	+			WBGene00241765	OVOC4956			0	0
						OVOC.OM2	7899210	7902308	-			WBGene00241766	OVOC4957			0	0
						OVOC.OM2	7903771	7907422	+			WBGene00241767	OVOC4958			0.025641	0.107686
						OVOC.OM2	7909221	7911768	-			WBGene00241768	OVOC4959			0	0
						OVOC.OM2	7913040	7919159	+	Ovo-nhr-67		WBGene00241769	OVOC4960	Nuclear Hormone Receptor family		0.0666667	0
						OVOC.OM2	7930453	7934001	-	Ovo-gly-10		WBGene00241770	OVOC4961	GLYcosylation related		0	0
						OVOC.OM2	7935318	7938089	-	Ovo-nft-1		WBGene00241771	OVOC4962	NitFhit family		0.153128	0.137584
						OVOC.OM2	7938948	7940326	+	Ovo-trap-4		WBGene00241772	OVOC4963	TRanslocon-Associated Protein		0.0625	0
						OVOC.OM2	7940809	7942964	+			WBGene00241773	OVOC4964			0	0
						OVOC.OM2	7945668	7946346	-			WBGene00241774	OVOC4965			0	0
						OVOC.OM2	7946645	7947755	+			WBGene00241775	OVOC4966			0	0
						OVOC.OM2	7949937	7952820	+			WBGene00241776	OVOC4967			0.260402	0.109912
						OVOC.OM2	7956758	7961545	+	Ovo-sec-3		WBGene00241777	OVOC4968	yeast SEC homolog		0.128645	0.246892
						OVOC.OM2	7962085	7965813	+			WBGene00241778	OVOC4969			0	0
						OVOC.OM2	7968422	7971951	-	Ovo-egl-17		WBGene00241779	OVOC4970	EGg Laying defective		0	0
						OVOC.OM2	7979022	7985369	-			WBGene00241780	OVOC4971			0	0.132406
						OVOC.OM2	7987206	7989163	+	Ovo-rps-2		WBGene00241781	OVOC4972	Ribosomal Protein, Small subunit		0	0
						OVOC.OM2	7989244	7991789	-	Ovo-pad-2		WBGene00241782	OVOC4973	PAtterning Defective		0	0
						OVOC.OM2	7992485	7994578	+			WBGene00241783	OVOC4974			0	0
						OVOC.OM2	7996078	7999229	+	Ovo-grp-1		WBGene00241784	OVOC4975	GTP exchange factor for ARFs		0	0.12216
						OVOC.OM2	8000005	8001569	+			WBGene00241785	OVOC4976			0	0
						OVOC.OM2	8003589	8007354	-			WBGene00241786	OVOC4977			0.039362	0.0711457
						OVOC.OM2	8007663	8008601	-			WBGene00241787	OVOC4978			0	0
						OVOC.OM2	8008841	8011382	-			WBGene00241788	OVOC4979			0.0338222	0.476886
						OVOC.OM2	8016966	8017758	+	Ovo-vamp-7		WBGene00241789	OVOC4980	VAMP (Vesicle Associated Membrane Protein) homolog		0	0
						OVOC.OM2	8018954	8019547	-			WBGene00241790	OVOC4981			0	0
						OVOC.OM2	8020194	8046622	+	Ovo-pezo-1	yes	WBGene00241791	OVOC4982	PiEZO-type mechanosensitive ion channel component related		0.217178	0.289693
						OVOC.OM2	8048712	8051860	-	Ovo-mks-1		WBGene00241792	OVOC4983	MecKel-Gruber Syndrome (MKS) homolog		0.083482	0.0376183
						OVOC.OM2	8051870	8053416	+			WBGene00241793	OVOC4984			0	0
						OVOC.OM2	8055047	8056026	+		yes	WBGene00241794	OVOC4985	Bzip transcription factor family protein		0.125	0.444287
						OVOC.OM2	8056790	8060492	-	Ovo-rabs-5		WBGene00241795	OVOC4986	RABenoSyn (trafficking protein) homolog		0.29174	0
						OVOC.OM2	8067339	8070000	+	Ovo-bed-3		WBGene00241796	OVOC4987	BED-type zinc finger putative transcription factor		0	0
Ghana	18	OVOC.OM2	8160000	8260000		OVOC.OM2	8164213	8168081	+	Ovo-lin-22		WBGene00241807	OVOC4998	abnormal cell LINeage		0.267936	0
						OVOC.OM2	8181680	8192903	+			WBGene00241808	OVOC4999			0	0.0476131
						OVOC.OM2	8195952	8197990	-			WBGene00241809	OVOC5000			0.0815561	0.0358056
						OVOC.OM2	8201715	8204341	-			WBGene00241810	OVOC5001			0	0
						OVOC.OM2	8205557	8211528	+	Ovo-copb-2		WBGene00241811	OVOC5002	COP (COat Protomer) Beta subunit		0.0861219	0.520644
						OVOC.OM2	8219322	8226035	-	Ovo-elt-1	yes	WBGene00241813	OVOC5004	Erythroid-Like Transcription factor family		0	0
						OVOC.OM2	8231470	8231721	+			WBGene00241814	OVOC5005			0	0
						OVOC.OM2	8233360	8233830	-			WBGene00241815	OVOC5006			0	0.0985554
						OVOC.OM2	8241865	8250260	-	Ovo-jac-1		WBGene00241816	OVOC5007	Juxtamembrane domain- Associated Catenin		0.0681833	0.10116
						OVOC.OM2	8251141	8254576	+			WBGene00241817	OVOC5008			0	0
						OVOC.OM2	8254828	8258627	-	Ovo-moc-3		WBGene00241818	OVOC5009	MOlybdenum Cofactor biosynthesis		0	0
						OVOC.OM2	8258862	8259074	+			WBGene00241819	OVOC5010			0	0
Ghana	19	OVOC.OM2	11280000	11370000		OVOC.OM2	11281451	11285170	-			WBGene00242306	OVOC5497			0.101164	0.213349
						OVOC.OM2	11288275	11300861	-	Ovo-piki-1		WBGene00242307	OVOC5498	phosphoInositide-3-KInase		0.021322	0.172871
						OVOC.OM2	11302669	11303279	+			WBGene00242308	OVOC5499			0	0
						OVOC.OM2	11303527	11307092	+	Ovo-sli-1		WBGene00242309	OVOC5500	Suppressor of LIneage defect		0.395314	0.144026
						OVOC.OM2	11309261	11319642	-			WBGene00242310	OVOC5501			0	0
						OVOC.OM2	11328547	11331095	+	Ovo-fat-4		WBGene00242314	OVOC5505	FATty acid desaturase		0	0
						OVOC.OM2	11332809	11335622	+			WBGene00255521	OVOC13495			0.0705812	0
						OVOC.OM2	11336852	11341640	-	Ovo-imp-3		WBGene00242315	OVOC5506	IntraMembrane Protease (IMPAS) family		0	0.0714286
						OVOC.OM2	11345256	11352611	+	Ovo-unc-26		WBGene00242316	OVOC5507	synaptojanin, a polyphosphoinositide phosphatase		0	0
						OVOC.OM2	11354201	11365679	-	Ovo-tat-2		WBGene00242317	OVOC5508	Transbilayer Amphipath Transporters (subfamily IV P-type ATPase)		0.138243	0.131909
Ghana	20	OVOC.OM2	11710000	11730000		OVOC.OM2	11711655	11713430	+			WBGene00242354	OVOC5545			0	0
						OVOC.OM2	11714093	11718096	-	Ovo-ipp-5		WBGene00242355	OVOC5546	Inositol Polyphosphate 5- Phosphatase		0	0.09509
						OVOC.OM2	11718337	11722001	+			WBGene00242356	OVOC5547			0	0
						OVOC.OM2	11729513	11730000	-	Ovo-sdpn-1		WBGene00242357	OVOC5548	SynDaPiN (synaptic dynamin binding protein) homolog		0	0.106116
Ghana	21	OVOC.OM2	11820000	12050000		OVOC.OM2	11820001	11822051	+			WBGene00242367	OVOC5558			0	0.286721
						OVOC.OM2	11833325	11852363	+	Ovo-unc-82		WBGene00242368	OVOC5559	serine/threonine kinase		0.04	0
						OVOC.OM2	11854254	11854842	+			WBGene00242372	OVOC5563			0	0.094175
						OVOC.OM2	11858176	11862995	-	Ovo-fog-3	yes	WBGene00242373	OVOC5564	Feminization Of Germline		0	0
						OVOC.OM2	11863621	11864028	+			WBGene00242374	OVOC5565			0	0
						OVOC.OM2	11868322	11872287	-	Ovo-acc-1		WBGene00242375	OVOC5566	Acetylcholine-gated Chloride Channel		0	0
						OVOC.OM2	11888634	11893629	-		yes	WBGene00242376	OVOC5567	Zinc finger protein		0.0733136	0.358055
						OVOC.OM2	11909453	11914111	+			WBGene00242377	OVOC5568			0.0636199	0.640664
						OVOC.OM2	11917341	11919626	-			WBGene00242378	OVOC5569			0.246624	0
						OVOC.OM2	11922384	11930257	+			WBGene00242379	OVOC5570			0	0
						OVOC.OM2	11930924	11932092	-			WBGene00242380	OVOC5571			0	0
						OVOC.OM2	11935404	11938515	-			WBGene00242381	OVOC5572			0	0
						OVOC.OM2	11944190	11945868	-			WBGene00242382	OVOC5573			0	0
						OVOC.OM2	11946319	11948068	-			WBGene00242383	OVOC5574			0	0.106116
						OVOC.OM2	11951278	11966403	-	Ovo-nmy-1		WBGene00242384	OVOC5575	Non-muscle MYosin		0.0663632	0.0880664
						OVOC.OM2	11969584	11970093	+			WBGene00242385	OVOC5576			0	0
						OVOC.OM2	11977819	11980611	+			WBGene00242386	OVOC5577			0.0771608	0
						OVOC.OM2	11982854	11984512	+	Ovo-igdb-3		WBGene00242387	OVOC5578	IG (immunoglobulin) and DB (Cys-rich) domains		0	0
						OVOC.OM2	11986656	11988083	+			WBGene00242388	OVOC5579			0.0761486	0.436158
						OVOC.OM2	11988384	11988903	+			WBGene00242389	OVOC5580			0	0
						OVOC.OM2	11990923	11991304	+			WBGene00242390	OVOC5581			0	0
						OVOC.OM2	11998037	12000837	+			WBGene00242391	OVOC5582			0	0.372833
						OVOC.OM2	12004674	12004991	-			WBGene00242392	OVOC5583			0.0311497	0.39111
						OVOC.OM2	12005033	12005305	-			WBGene00242393	OVOC5584			0	0
						OVOC.OM2	12007582	12007832	-			WBGene00242394	OVOC5585			0.169866	0.522747
						OVOC.OM2	12008269	12008723	-			WBGene00242395	OVOC5586			0	0
						OVOC.OM2	12008774	12011212	-			WBGene00242396	OVOC5587			0	0
						OVOC.OM2	12013419	12014838	+	rac-2	yes	WBGene00242397	OVOC5588	RAC related		0	0.0828538
						OVOC.OM2	12016660	12021350	+			WBGene00242398	OVOC5589	F52H2.7 is involved in embryo development.		0.248389	0.440176
						OVOC.OM2	12027075	12034517	-	Ovo-gei-15		WBGene00242399	OVOC5590	GEX Interacting protein		0	0
						OVOC.OM2	12043035	12043606	+			WBGene00242401	OVOC5592			0	0
						OVOC.OM2	12049616	12050000	+			WBGene00242402	OVOC5593			0	0
Cameroon	22	OVOC.OM2	15530000	15680000		OVOC.OM2	15530945	15533479	-	Ovo-ttr-51		WBGene00242921	OVOC6112	TransThyretin-Related family domain		0.592966	0.161342
						OVOC.OM2	15543155	15544804	+	Ovo-hsp-17		WBGene00242922	OVOC6113	Heat Shock Protein		0.675716	0.0551204
						OVOC.OM2	15546200	15549833	-		yes	WBGene00242923	OVOC6114	Tetratricopeptide repeat protein 5		0.715122	0.0739878
						OVOC.OM2	15551502	15557280	+	Ovo-reps-1		WBGene00242924	OVOC6115	REPS (RalBP1-associated Eps domain-containing protein) homolog		0.673605	0.0689024
						OVOC.OM2	15559190	15561064	-			WBGene00242925	OVOC6116			0.0634132	0.122075
						OVOC.OM2	15567980	15570186	+			WBGene00242926	OVOC6117			0.626151	0.24211
						OVOC.OM2	15571793	15573374	+		yes	WBGene00242927	OVOC6118	Receptor expression-enhancing protein		0.792691	0.0525795
						OVOC.OM2	15575082	15578282	+			WBGene00242928	OVOC6119			0.609183	0.117253
						OVOC.OM2	15580451	15589802	+			WBGene00242929	OVOC6120	RNA-binding protein Nova-2		0.473893	0.106025
						OVOC.OM2	15591320	15599619	+	bgal-1	yes	WBGene00242932	OVOC6123	Beta GALactosidase homolog		0.616914	0.0630702
						OVOC.OM2	15602377	15605302	-			WBGene00242933	OVOC6124			0.53857	0.100575
						OVOC.OM2	15618221	15621100	-		yes	WBGene00242934	OVOC6125	G-protein coupled receptor activity		0.42152	0.0829514
						OVOC.OM2	15643304	15652090	-	mab-23	yes	WBGene00242936	OVOC6127	Male ABnormal		0	0
						OVOC.OM2	15660828	15663629	+			WBGene00242938	OVOC6129			0.36194	0.0813512
						OVOC.OM2	15664750	15670348	+			WBGene00255525	OVOC13498			0.290741	0.0773375
Ghana	23	OVOC.OM2	16350000	16600000		OVOC.OM2	16350001	16360975	+	Ovo-ehbp-1		WBGene00243018	OVOC6209	EH (Eps-15-homology) domain Binding Protein family		0.180139	0.251094
						OVOC.OM2	16367563	16376696	+	Ovo-rgef-1		WBGene00243019	OVOC6210	Rap Guanine nucleotide Exchange Factor homolog		0	0
						OVOC.OM2	16378199	16379396	+			WBGene00243020	OVOC6211			0	0
						OVOC.OM2	16381942	16382483	+			WBGene00243021	OVOC6212			0	0
						OVOC.OM2	16382053	16382304	-			WBGene00243022	OVOC6213			0	0
						OVOC.OM2	16384769	16385452	+			WBGene00243023	OVOC6214			0	0
						OVOC.OM2	16385475	16385656	-			WBGene00243024	OVOC6215			0.14491	0.142944
						OVOC.OM2	16387980	16390144	+	Ovo-clic-1		WBGene00243025	OVOC6216	Clathrin LIght Chain		0	0
						OVOC.OM2	16393274	16395487	+			WBGene00243026	OVOC6217			0	0
						OVOC.OM2	16397410	16403906	+	Ovo-pph-5		WBGene00243027	OVOC6218	Protein PHosphatase		0	0
						OVOC.OM2	16404447	16405660	+			WBGene00243028	OVOC6219			0	0
						OVOC.OM2	16406983	16417382	-	Ovo-oac-9		WBGene00243029	OVOC6220	O-ACyltransferase homolog		0.139485	0.197941
						OVOC.OM2	16417743	16418359	-			WBGene00243030	OVOC6221			0.058086	0.0351685
						OVOC.OM2	16419872	16421802	+			WBGene00243031	OVOC6222			0	0
						OVOC.OM2	16423131	16424498	-			WBGene00243032	OVOC6223			0	0.0822547
						OVOC.OM2	16425963	16428743	-	Ovo-lin-53		WBGene00243033	OVOC6224	abnormal cell LINeage		0	0
						OVOC.OM2	16431112	16434169	-	Ovo-galt-1		WBGene00243034	OVOC6225	GALacTosyltransferase		0	0
						OVOC.OM2	16440103	16443988	-	cdkl-1	yes	WBGene00243036	OVOC6227	Cyclin-Dependent Kinase- Like		0.0213752	0.142986
						OVOC.OM2	16446871	16457504	-			WBGene00243037	OVOC6228			0.164468	0.168438
						OVOC.OM2	16462495	16467151	-			WBGene00243038	OVOC6229			0.283925	0.11113
						OVOC.OM2	16468689	16471065	+	Ovo-hda-11		WBGene00243039	OVOC6230	Histone DeAcetylase		0.119308	0.142908
						OVOC.OM2	16475514	16476272	-			WBGene00243040	OVOC6231			0	0
						OVOC.OM2	16483524	16485957	-			WBGene00243041	OVOC6232			0	0
						OVOC.OM2	16495373	16498818	+			WBGene00243042	OVOC6233			0.0196397	0
						OVOC.OM2	16507273	16508357	+	Ovo-snb-1		WBGene00243043	OVOC6234	SyNaptoBrevin related		0	0
						OVOC.OM2	16510510	16513441	+	Ovo-syx-18		WBGene00243044	OVOC6235	SYntaXin		0	0
						OVOC.OM2	16515416	16516035	-			WBGene00243045	OVOC6236			0	0
						OVOC.OM2	16516225	16519003	+	erfa-1	yes	WBGene00243046	OVOC6237	Eukaryotic Release FActor homolog		0	0
						OVOC.OM2	16521622	16524083	+	hpo-19	yes	WBGene00243047	OVOC6238	Hypersensitive to POre- forming toxin		0	0
						OVOC.OM2	16524931	16525901	-			WBGene00243048	OVOC6239			0	0
						OVOC.OM2	16526217	16526959	-			WBGene00243049	OVOC6240			0	0
						OVOC.OM2	16530465	16531152	+			WBGene00243050	OVOC6241			0	0
						OVOC.OM2	16533771	16536232	+			WBGene00243051	OVOC6242	NADH-cytochrome b5 reductase		0	0
						OVOC.OM2	16537080	16538050	-			WBGene00243052	OVOC6243			0	0
						OVOC.OM2	16538366	16539108	-			WBGene00243053	OVOC6244			0	0
						OVOC.OM2	16542022	16543427	+	erfa-1	yes	WBGene00243054	OVOC6245	Eukaryotic Release FActor homolog		0	0
						OVOC.OM2	16543577	16545194	-			WBGene00243056	OVOC6247			0	0
						OVOC.OM2	16545906	16548409	+	fut-5	yes	WBGene00243057	OVOC6248	FUcosyl Transferase		0	0.125116
						OVOC.OM2	16549875	16555295	+			WBGene00243058	OVOC6249			0	0
						OVOC.OM2	16556043	16561543	+			WBGene00243059	OVOC6250			0	0
						OVOC.OM2	16571246	16582699	+			WBGene00243060	OVOC6251			0.0821814	0.121948
						OVOC.OM2	16585262	16586167	-			WBGene00243061	OVOC6252			0.0853111	0.171985
						OVOC.OM2	16590523	16600000	+			WBGene00243064	OVOC6255			0.0833333	0
Cameroon	24	OVOC.OM2	21220000	21290000		OVOC.OM2	21221155	21226481	-			WBGene00243769	OVOC6960			0.455626	0.120408
						OVOC.OM2	21227375	21229866	-			WBGene00243770	OVOC6961			0.181859	0.275107
						OVOC.OM2	21230291	21235330	+	Ovo-cyp-42A1		WBGene00243771	OVOC6962	CYtochrome P450 family		0.532693	0.141333
						OVOC.OM2	21240316	21241158	-			WBGene00243772	OVOC6963			0.185493	0.0529884
						OVOC.OM2	21243667	21247599	+			WBGene00243773	OVOC6964			0.404083	0.169341
						OVOC.OM2	21248855	21265357	-	soap-1	yes	WBGene00243774	OVOC6965	Sorting Of Apical Proteins		0.400694	0.13618
						OVOC.OM2	21266455	21267404	-			WBGene00243775	OVOC6966			0.521029	0.345565
						OVOC.OM2	21268015	21269546	+			WBGene00243776	OVOC6967			0	0
						OVOC.OM2	21273241	21279192	+	Ovo-ncx-5		WBGene00243777	OVOC6968	Na/Ca eXchangers		0.351035	0.0771156
						OVOC.OM2	21282412	21285877	-			WBGene00243778	OVOC6969			0.388585	0.144987
						OVOC.OM2	21287213	21288315	-			WBGene00243779	OVOC6970			0.423765	0.114842
						OVOC.OM2	21289373	21290000	+	ppgn-1	yes	WBGene00243780	OVOC6971	ParaPleGiN AAA protease family		0.269001	0.0413791
Cameroon	25	OVOC.OM3	10000	220000		OVOC.OM3	10001	11254	+			WBGene00244316	OVOC7507			0.172844	0.0632728
						OVOC.OM3	12215	13509	-			WBGene00244317	OVOC7508			0	0
						OVOC.OM3	13819	15403	+			WBGene00244318	OVOC7509			0.412866	0.0700893
						OVOC.OM3	16240	18452	-	hpl-1	yes	WBGene00244319	OVOC7510	HP1 Like (heterochromatin protein)		0.0384615	0
						OVOC.OM3	20214	21410	+			WBGene00244320	OVOC7511			0.72438	0.0459563
						OVOC.OM3	21815	25450	+			WBGene00244321	OVOC7512			0.231598	0.0591706
						OVOC.OM3	40223	48753	+	Ovo-pes-4		WBGene00244322	OVOC7513	Patterned Expression Site		0.281644	0.077816
						OVOC.OM3	50440	55315	-	Ovo-hpo-10		WBGene00244324	OVOC7515	Hypersensitive to POre- forming toxin		0.417857	0.0640762
						OVOC.OM3	55942	58169	+	Ovo-rpb-3		WBGene00244325	OVOC7516	RNA Polymerase II (B) subunit		0	0
						OVOC.OM3	66599	83198	+	Ovo-mup-4		WBGene00244327	OVOC7518	MUscle Positioning		0.0285714	0
						OVOC.OM3	84394	108005	+	Ovo-mua-3		WBGene00244328	OVOC7519	MUscle Attachment abnormal		0.392751	0.106441
						OVOC.OM3	121202	127504	-	Ovo-mdt-15		WBGene00244330	OVOC7521	MeDiaTor		0.200694	0.150725
						OVOC.OM3	129454	140176	-	Ovo-ddx-23		WBGene00244331	OVOC7522	DEAD boX helicase homolog		0.325685	0.0850038
						OVOC.OM3	140481	144028	-			WBGene00244332	OVOC7523			0	0
						OVOC.OM3	150053	155580	+			WBGene00244333	OVOC7524	Lipoyl synthase, mitochondrial		0.0138023	0
						OVOC.OM3	156588	159571	+			WBGene00244335	OVOC7526			0.265114	0.107001
						OVOC.OM3	160999	164097	+			WBGene00244336	OVOC7527			0.369489	0.0380425
						OVOC.OM3	164160	167907	-			WBGene00244337	OVOC7528			0.0634366	0
						OVOC.OM3	169005	169910	+	Ovo-cuc-1		WBGene00244338	OVOC7529	CU (copper) Chaperonin		0	0
						OVOC.OM3	170060	173928	-		yes	WBGene00244339	OVOC7530	Digestive organ expansion factor homolog		0.533326	0.0993603
						OVOC.OM3	174497	177091	-	Ovo-elb-1		WBGene00244340	OVOC7531	ELongin B		0	0.11295
						OVOC.OM3	178453	180098	-			WBGene00244341	OVOC7532			0.360119	0.0635942
						OVOC.OM3	181748	187568	-	Ovo-gly-9		WBGene00244342	OVOC7533	GLYcosylation related		0.316145	0.145982
						OVOC.OM3	189836	191889	-			WBGene00244343	OVOC7534			0	0
						OVOC.OM3	193436	201960	-	Ovo-sca-1		WBGene00244344	OVOC7535	SERCA (Sarco-Endoplasmic Reticulum Calcium ATPase)		0.535689	0.0747663
						OVOC.OM3	217543	220000	-			WBGene00244346	OVOC7537			0	0
Cameroon	26	OVOC.OM3	280000	370000		OVOC.OM3	280001	281934	+			WBGene00244351	OVOC7542			0.245418	0.137875
						OVOC.OM3	284476	289370	-			WBGene00244352	OVOC7543			0	0
						OVOC.OM3	289854	290418	+			WBGene00244353	OVOC7544			0.507039	0.342672
						OVOC.OM3	302361	304620	+	Ovo-pas-2		WBGene00244354	OVOC7545	Proteasome Alpha Subunit		0	0
						OVOC.OM3	305244	307075	+			WBGene00244355	OVOC7546			0.397459	0.0589243
						OVOC.OM3	307996	309095	-	Ovo-taf-9		WBGene00244356	OVOC7547	TAF (TBP-associated transcription factor) family		0	0.118302
						OVOC.OM3	309721	311157	-	Ovo-mlc-5		WBGene00244357	OVOC7548	Myosin Light Chain		0	0
						OVOC.OM3	312060	314700	-			WBGene00255476	OVOC13461			0	0
						OVOC.OM3	314903	316825	-	Ovo-hus-1		WBGene00244358	OVOC7549	human HUS1 related		0.294952	0.115795
						OVOC.OM3	318741	323680	+	Ovo-polh-1		WBGene00244359	OVOC7550	POLH (DNA polymerase eta) homolog		0.299619	0.0421265
						OVOC.OM3	324519	324643	-			WBGene00255092	OVOC13103			0	0
						OVOC.OM3	331696	333110	+			WBGene00244360	OVOC7551			0	0
						OVOC.OM3	333807	348257	+	clp-1	yes	WBGene00244362	OVOC7553	CaLPain family		0.424857	0.125042
						OVOC.OM3	349249	350872	+	immp-2	yes	WBGene00255421	OVOC13412	Inner Mitochondrial Membrane Protease		0	0
						OVOC.OM3	352376	359408	-		yes	WBGene00244363	OVOC7554	Inhibitor of nuclear factor kappa-B kinase subunit epsilon		0.539115	0.0937901
						OVOC.OM3	362437	363597	+			WBGene00244364	OVOC7555			0.744512	0.0950368
						OVOC.OM3	363969	365015	+			WBGene00244365	OVOC7556			0.387546	0.328855
						OVOC.OM3	366556	367952	+			WBGene00244366	OVOC7557			0.0476191	0
Cameroon	27	OVOC.OM3	6040000	6070000		OVOC.OM3	6044651	6048525	+			WBGene00245069	OVOC8260			0.34385	0.0961686
						OVOC.OM3	6049685	6052010	-			WBGene00245070	OVOC8261			0.418245	0.131533
						OVOC.OM3	6052637	6054623	+			WBGene00245071	OVOC8262			0.42022	0.0961856
						OVOC.OM3	6055466	6059296	+	mei-1	yes	WBGene00245072	OVOC8263	defective MEIosis		0.489434	0.0920676
						OVOC.OM3	6060213	6069390	+	Ovo-lgc-46		WBGene00245073	OVOC8264	Ligand-Gated ion Channel		0.487168	0.116872
Cameroon	28	OVOC.OM3	6110000	6170000		OVOC.OM3	6110001	6112152	+			WBGene00245082	OVOC8273			0.252638	0.0628593
						OVOC.OM3	6113831	6115626	+			WBGene00245083	OVOC8274			0.0953295	0.0394442
						OVOC.OM3	6116920	6121176	-	Ovo-rsp-8		WBGene00245084	OVOC8275	SR Protein (splicing factor)		0.336036	0.110174
						OVOC.OM3	6121559	6122341	+			WBGene00245085	OVOC8276			0.238693	0.139489
						OVOC.OM3	6124318	6130516	+	Ovo-pcf-11		WBGene00245086	OVOC8277	cleavage and polyadenylation factor homolog		0.369365	0.0839385
						OVOC.OM3	6131485	6133877	+			WBGene00245087	OVOC8278			0.453471	0.119687
						OVOC.OM3	6134194	6135019	-			WBGene00245088	OVOC8279			0	0
						OVOC.OM3	6135669	6136435	+			WBGene00245089	OVOC8280			0.0771912	0.0602985
						OVOC.OM3	6142770	6143702	+			WBGene00245090	OVOC8281			0.435393	0.103556
						OVOC.OM3	6144898	6146703	+			WBGene00245091	OVOC8282			0.071679	0
						OVOC.OM3	6148555	6149965	+			WBGene00245092	OVOC8283			0	0
						OVOC.OM3	6151081	6153038	-	Ovo-mrpl-46		WBGene00245093	OVOC8284	Mitochondrial Ribosomal Protein, Large		0.716333	0
						OVOC.OM3	6153438	6157081	+	ham-3	yes	WBGene00245094	OVOC8285	HSN Abnormal Migration		0.285782	0.130811
						OVOC.OM3	6158154	6159341	+			WBGene00245095	OVOC8286			0.335991	0.0410761
						OVOC.OM3	6159876	6162882	-	Ovo-ccdc-47		WBGene00245096	OVOC8287	CCDC (human Coiled Coil Domain Containing) homolog		0.44678	0.0701562
						OVOC.OM3	6163683	6170000	+	Ovo-gcn-1		WBGene00245097	OVOC8288	GCN (yeast General Control Nondrepressible) homolog		0.337133	0.151874
Ghana	29	OVOC.OM3	13550000	13570000		OVOC.OM3	13550001	13553509	-		yes	WBGene00246100	OVOC9291	predicted to have fatty-acyl-CoA binding activity		0.036843	0.315445
						OVOC.OM3	13554562	13557405	-			WBGene00246101	OVOC9292			0.0336146	0.325426
						OVOC.OM3	13558385	13560865	-	Ovo-ppfr-4		WBGene00246102	OVOC9293	Protein Phosphatase Four Regulatory subunit		0.0354625	0.259697
						OVOC.OM3	13561243	13563992	+			WBGene00246103	OVOC9294			0.0372973	0.341705
						OVOC.OM3	13564661	13566897	+			WBGene00246104	OVOC9295			0.0481172	0.41513
						OVOC.OM3	13567512	13568289	+	Ovo-pen-2		WBGene00246105	OVOC9296	Presenilin ENhancer (enhancer of sel- 12(null)		0	0
Cameroon	30	OVOC.OM4	1130000	1170000		OVOC.OM4	1130001	1134786	-			WBGene00246632	OVOC9823			0.371077	0.140634
						OVOC.OM4	1139008	1152429	+	Ovo-toe-1		WBGene00246633	OVOC9824	Target Of ERK kinase MPK-1		0.537876	0.130542
						OVOC.OM4	1153128	1158964	-	Ovo-dis-3		WBGene00246634	OVOC9825	DIS3 (yeast disjunction abnormal) exonuclease homolog		0.515685	0.190089
						OVOC.OM4	1159601	1161382	-			WBGene00246635	OVOC9826			0	0.136938
						OVOC.OM4	1162510	1163742	+			WBGene00246636	OVOC9827			0.0204082	0.13023
						OVOC.OM4	1163762	1170000	+			WBGene00246637	OVOC9828			0	0
						OVOC.OM4	1166080	1169696	-			WBGene00246638	OVOC9829			0.0593003	0.0905378
Ghana	31	OVOC.OM5	1060000	1080000		OVOC.OM5	1060001	1067312	+			WBGene00248885	OVOC12076	Ran-binding protein 16		0.136872	0.228362
						OVOC.OM5	1073647	1075969	+			WBGene00248886	OVOC12077			0.0401956	0.228172
						OVOC.OM5	1079701	1080000	-	Ovo-egl-10		WBGene00248887	OVOC12078	EGg Laying defective		0.192981	0.148825
