# Supplementary material for: Genome-wide analysis of ivermectin response by Onchocerca volvulus reveals that genetic drift and soft selective sweeps contribute to loss of drug sensitivity
Source: PLoS Negl Trop Dis. 2017 Jul 26;11(7):e0005816. doi: 10.1371/journal.pntd.0005816 (PMC5546710; doi:10.1371/journal.pntd.0005816)
Supplement: S7 Table — (XLSX) [file pntd.0005816.s007.xlsx]

## Sheet: Sheet1
S7 Table: Names and coordinates of the 160 SNPs genotyped by Sequenom
SNP name	Scaffold	Position
OVOC.OM1a_1417213	OVOC.OM1a	1417213
OVOC.OM1a_1962993	OVOC.OM1a	1962993
OVOC.OM1a_2385585	OVOC.OM1a	2385585
OVOC.OM1a_2403735	OVOC.OM1a	2403735
OVOC.OM1a_2406103	OVOC.OM1a	2406103
OVOC.OM1a_2422763	OVOC.OM1a	2422763
OVOC.OM1a_2429121	OVOC.OM1a	2429121
OVOC.OM1a_2434057	OVOC.OM1a	2434057
OVOC.OM1a_935091	OVOC.OM1a	935091
OVOC.OM1a_940707	OVOC.OM1a	940707
OVOC.OM1b_11382259	OVOC.OM1b	11382259
OVOC.OM1b_15264729	OVOC.OM1b	15264729
OVOC.OM1b_15412280	OVOC.OM1b	15412280
OVOC.OM1b_15693245	OVOC.OM1b	15693245
OVOC.OM1b_175863	OVOC.OM1b	175863
OVOC.OM1b_22262905	OVOC.OM1b	22262905
OVOC.OM1b_24659865	OVOC.OM1b	24659865
OVOC.OM1b_24670438	OVOC.OM1b	24670438
OVOC.OM1b_24715233	OVOC.OM1b	24715233
OVOC.OM1b_24715786	OVOC.OM1b	24715786
OVOC.OM1b_24722996	OVOC.OM1b	24722996
OVOC.OM1b_24725169	OVOC.OM1b	24725169
OVOC.OM1b_25870141	OVOC.OM1b	25870141
OVOC.OM1b_25875430	OVOC.OM1b	25875430
OVOC.OM1b_25879084	OVOC.OM1b	25879084
OVOC.OM1b_25932865	OVOC.OM1b	25932865
OVOC.OM1b_26105799	OVOC.OM1b	26105799
OVOC.OM1b_2662546	OVOC.OM1b	2662546
OVOC.OM1b_27126615	OVOC.OM1b	27126615
OVOC.OM1b_27343614	OVOC.OM1b	27343614
OVOC.OM1b_27346277	OVOC.OM1b	27346277
OVOC.OM1b_27357307	OVOC.OM1b	27357307
OVOC.OM1b_27416247	OVOC.OM1b	27416247
OVOC.OM1b_27426371	OVOC.OM1b	27426371
OVOC.OM1b_2900615	OVOC.OM1b	2900615
OVOC.OM1b_3345943	OVOC.OM1b	3345943
OVOC.OM1b_3854201	OVOC.OM1b	3854201
OVOC.OM1b_4400750	OVOC.OM1b	4400750
OVOC.OM1b_4406277	OVOC.OM1b	4406277
OVOC.OM1b_5242483	OVOC.OM1b	5242483
OVOC.OM1b_586109	OVOC.OM1b	586109
OVOC.OM1b_6657434	OVOC.OM1b	6657434
OVOC.OM1b_7277572	OVOC.OM1b	7277572
OVOC.OM1b_8102901	OVOC.OM1b	8102901
OVOC.OM1b_8102995	OVOC.OM1b	8102995
OVOC.OM1b_8115324	OVOC.OM1b	8115324
OVOC.OM1b_8117617	OVOC.OM1b	8117617
OVOC.OM1b_8123991	OVOC.OM1b	8123991
OVOC.OM1b_8399370	OVOC.OM1b	8399370
OVOC.OM1b_8515300	OVOC.OM1b	8515300
OVOC.OM1b_9678638	OVOC.OM1b	9678638
OVOC.OM1b_9720858	OVOC.OM1b	9720858
OVOC.OM2_11828248	OVOC.OM2	11828248
OVOC.OM2_1242818	OVOC.OM2	1242818
OVOC.OM2_13431835	OVOC.OM2	13431835
OVOC.OM2_15934389	OVOC.OM2	15934389
OVOC.OM2_16018772	OVOC.OM2	16018772
OVOC.OM2_17375161	OVOC.OM2	17375161
OVOC.OM2_17406274	OVOC.OM2	17406274
OVOC.OM2_17826333	OVOC.OM2	17826333
OVOC.OM2_18156546	OVOC.OM2	18156546
OVOC.OM2_2389829	OVOC.OM2	2389829
OVOC.OM2_24343786	OVOC.OM2	24343786
OVOC.OM2_24786084	OVOC.OM2	24786084
OVOC.OM2_25338965	OVOC.OM2	25338965
OVOC.OM2_3273538	OVOC.OM2	3273538
OVOC.OM2_442635	OVOC.OM2	442635
OVOC.OM2_822671	OVOC.OM2	822671
OVOC.OM2_9550527	OVOC.OM2	9550527
OVOC.OM3_11738312	OVOC.OM3	11738312
OVOC.OM3_12556276	OVOC.OM3	12556276
OVOC.OM3_12558575	OVOC.OM3	12558575
OVOC.OM3_14172412	OVOC.OM3	14172412
OVOC.OM3_14222173	OVOC.OM3	14222173
OVOC.OM3_15420617	OVOC.OM3	15420617
OVOC.OM3_15472616	OVOC.OM3	15472616
OVOC.OM3_16245109	OVOC.OM3	16245109
OVOC.OM3_16254739	OVOC.OM3	16254739
OVOC.OM3_2379850	OVOC.OM3	2379850
OVOC.OM3_3172448	OVOC.OM3	3172448
OVOC.OM3_3947787	OVOC.OM3	3947787
OVOC.OM3_4215124	OVOC.OM3	4215124
OVOC.OM3_4216815	OVOC.OM3	4216815
OVOC.OM3_4224625	OVOC.OM3	4224625
OVOC.OM3_692935	OVOC.OM3	692935
OVOC.OM3_8698814	OVOC.OM3	8698814
OVOC.OM3_8723944	OVOC.OM3	8723944
OVOC.OM3_8899567	OVOC.OM3	8899567
OVOC.OM3_8957381	OVOC.OM3	8957381
OVOC.OM3_8972954	OVOC.OM3	8972954
OVOC.OM3_9006953	OVOC.OM3	9006953
OVOC.OM3_9021671	OVOC.OM3	9021671
OVOC.OM3_9024750	OVOC.OM3	9024750
OVOC.OM3_9026554	OVOC.OM3	9026554
OVOC.OM3_9037418	OVOC.OM3	9037418
OVOC.OM3_9041264	OVOC.OM3	9041264
OVOC.OM3_9051736	OVOC.OM3	9051736
OVOC.OM3_942124	OVOC.OM3	942124
OVOC.OM3_942127	OVOC.OM3	942127
OVOC.OM4_10552923	OVOC.OM4	10552923
OVOC.OM4_12307027	OVOC.OM4	12307027
OVOC.OM4_12908824	OVOC.OM4	12908824
OVOC.OM4_12909207	OVOC.OM4	12909207
OVOC.OM4_12910198	OVOC.OM4	12910198
OVOC.OM4_12910265	OVOC.OM4	12910265
OVOC.OM4_12910367	OVOC.OM4	12910367
OVOC.OM4_12922917	OVOC.OM4	12922917
OVOC.OM4_12949329	OVOC.OM4	12949329
OVOC.OM4_13027184	OVOC.OM4	13027184
OVOC.OM4_14565316	OVOC.OM4	14565316
OVOC.OM4_15179475	OVOC.OM4	15179475
OVOC.OM4_15187238	OVOC.OM4	15187238
OVOC.OM4_15598240	OVOC.OM4	15598240
OVOC.OM4_15598246	OVOC.OM4	15598246
OVOC.OM4_15599037	OVOC.OM4	15599037
OVOC.OM4_15599167	OVOC.OM4	15599167
OVOC.OM4_1888614	OVOC.OM4	1888614
OVOC.OM4_1891645	OVOC.OM4	1891645
OVOC.OM4_2039285	OVOC.OM4	2039285
OVOC.OM4_2242968	OVOC.OM4	2242968
OVOC.OM4_3732036	OVOC.OM4	3732036
OVOC.OM4_5566648	OVOC.OM4	5566648
OVOC.OM4_5573125	OVOC.OM4	5573125
OVOC.OM4_5593913	OVOC.OM4	5593913
OVOC.OM4_5600714	OVOC.OM4	5600714
OVOC.OM4_5653524	OVOC.OM4	5653524
OVOC.OM4_6779194	OVOC.OM4	6779194
OVOC.OM4_8126687	OVOC.OM4	8126687
OVOC.OM4_8283337	OVOC.OM4	8283337
OVOC.OM4_8309096	OVOC.OM4	8309096
OVOC.OM4_8364515	OVOC.OM4	8364515
OVOC.OM4_8535984	OVOC.OM4	8535984
OVOC.OM4_9136066	OVOC.OM4	9136066
OVOC.OM4_9391628	OVOC.OM4	9391628
OVOC.OM4_9879035	OVOC.OM4	9879035
OVOC.OM5_1061643	OVOC.OM5	1061643
OVOC.OM5_1064071	OVOC.OM5	1064071
OVOC.OM5_1069135	OVOC.OM5	1069135
OVOC.OM5_223916	OVOC.OM5	223916
OVOC.OO.000004_23223	OVOC.OO.000004	23223
OVOC.OO.000004_24058	OVOC.OO.000004	24058
OVOC.OO.000004_24688	OVOC.OO.000004	24688
OVOC.OO.000004_24768	OVOC.OO.000004	24768
OVOC.OO.000004_24789	OVOC.OO.000004	24789
OVOC.OO.000004_27974	OVOC.OO.000004	27974
OVOC.OO.000004_30304	OVOC.OO.000004	30304
OVOC.OO.000013_9458	OVOC.OO.000013	9458
OVOC.OO.000055_15617	OVOC.OO.000055	15617
OVOC.OO.000086_11017	OVOC.OO.000086	11017
OVOC.OO.000086_11404	OVOC.OO.000086	11404
OVOC.OO.000086_12089	OVOC.OO.000086	12089
OVOC.OO.000086_4842	OVOC.OO.000086	4842
OVOC.OO.000086_8592	OVOC.OO.000086	8592
OVOC.OO.000086_9629	OVOC.OO.000086	9629
OVOC.OO.000091_8721	OVOC.OO.000091	8721
OVOC.OO.000108_5020	OVOC.OO.000108	5020
OVOC.OO.000108_7874	OVOC.OO.000108	7874
OVOC.OO.000111_7079	OVOC.OO.000111	7079
OVOC.OO.000112_2846	OVOC.OO.000112	2846
OVOC.OO.000165_4193	OVOC.OO.000165	4193
