# Supplementary material for: Genome-wide analysis of ivermectin response by Onchocerca volvulus reveals that genetic drift and soft selective sweeps contribute to loss of drug sensitivity
Source: PLoS Negl Trop Dis. 2017 Jul 26;11(7):e0005816. doi: 10.1371/journal.pntd.0005816 (PMC5546710; doi:10.1371/journal.pntd.0005816)
Supplement: S9 Table — (XLSX) [file pntd.0005816.s009.xlsx]

## Sheet: Sheet1
S9 Table: HWE analysis of GR and SOR populations from Ghana
					GR					SOR
Scaffold	Position	Allele 1 (A1)	Allele 2 (A2)		A1A1--A1A2--A2A2	Obs(het)	Exp(Het)	P-value		A1A1--A1A2--A2A2	Obs(het)	Exp(Het)	P-value
OVOC.OM1a	935091	G	T		4--70--14	0.7955	0.4935	6.117e-09		1--26--9	0.7222	0.4753	0.003804
OVOC.OM1a	940707	G	A		11--65--14	0.7222	0.4994	4.527e-05		3--27--7	0.7297	0.4942	0.007309
OVOC.OM1a	1417213	T	C		4--46--34	0.5476	0.4362	0.02501		1--23--10	0.6765	0.465	0.01193
OVOC.OM1a	1962993	T	C		5--63--20	0.7159	0.4855	8.681e-06		2--28--7	0.7568	0.4909	0.002041
OVOC.OM1a	2403735	G	A		1--43--46	0.4778	0.375	0.01019		1--22--11	0.6471	0.4567	0.02506
OVOC.OM1a	2422763	A	C		4--35--47	0.407	0.375	0.5701		3--21--11	0.6	0.4739	0.1676
OVOC.OM1a	2429121	C	A		1--31--47	0.3924	0.3305	0.169		1--18--13	0.5625	0.4297	0.1208
OVOC.OM1a	2434057	T	C		7--48--22	0.6234	0.481	0.01683		2--24--11	0.6486	0.4704	0.03656
OVOC.OM1b	175863	C	G		0--79--6	0.9294	0.4975	5.916e-18		0--34--3	0.9189	0.4967	1.051e-07
OVOC.OM1b	586109	C	T		0--20--67	0.2299	0.2035	0.5929		0--12--25	0.3243	0.2717	0.5611
OVOC.OM1b	2662546	A	T		2--44--39	0.5176	0.4053	0.01449		1--28--7	0.7778	0.4861	0.0004759
OVOC.OM1b	2900615	C	A		2--12--60	0.1622	0.1928	0.1863		0--10--26	0.2778	0.2392	1
OVOC.OM1b	4400750	G	T		6--70--13	0.7865	0.4969	3.929e-08		4--28--4	0.7778	0.5	0.00213
OVOC.OM1b	4406277	A	G		7--67--14	0.7614	0.4968	6.232e-07		2--29--2	0.8788	0.5	1.952e-05
OVOC.OM1b	5242483	T	A		0--9--81	0.1	0.095	1		0--7--30	0.1892	0.1713	1
OVOC.OM1b	7277572	G	A		0--20--59	0.2532	0.2211	0.6002		0--9--23	0.2812	0.2417	1
OVOC.OM1b	8102901	A	G		0--17--53	0.2429	0.2134	0.5827		0--11--21	0.3438	0.2847	0.5558
OVOC.OM1b	8102995	C	T		2--68--14	0.8095	0.4898	1.082e-09		1--27--6	0.7941	0.4892	0.0004127
OVOC.OM1b	8115324	T	G		0--73--4	0.9481	0.4987	1.149e-17		0--26--5	0.8387	0.487	8.611e-05
OVOC.OM1b	8117617	T	C		0--13--70	0.1566	0.1444	1		1--6--30	0.1622	0.1928	0.3442
OVOC.OM1b	8123991	C	T		1--26--57	0.3095	0.2778	0.4488		1--9--24	0.2647	0.2712	1
OVOC.OM1b	8515300	A	C		8--58--15	0.716	0.4963	0.0001125		2--25--7	0.7353	0.4892	0.005673
OVOC.OM1b	9678638	T	A		3--46--36	0.5412	0.4246	0.01948		1--22--13	0.6111	0.4444	0.05548
OVOC.OM1b	9720858	A	T		0--35--51	0.407	0.3242	0.01794		1--13--18	0.4062	0.3589	0.6521
OVOC.OM1b	11382259	G	A		1--44--40	0.5176	0.3947	0.004742		0--19--18	0.5135	0.3817	0.07637
OVOC.OM1b	15264729	G	T		3--8--65	0.1053	0.1672	0.01173		0--2--24	0.07692	0.07396	1
OVOC.OM1b	15412280	A	G		1--65--20	0.7558	0.4756	1.081e-08		1--26--8	0.7429	0.48	0.001722
OVOC.OM1b	22262905	T	C		6--42--35	0.506	0.439	0.2157		0--16--16	0.5	0.375	0.1475
OVOC.OM1b	24659865	T	C		9--59--9	0.7662	0.5	3.98e-06		5--25--5	0.7143	0.5	0.01964
OVOC.OM1b	24670438	G	A		1--55--34	0.6111	0.4328	5.327e-05		0--25--10	0.7143	0.4592	0.001924
OVOC.OM1b	24715233	T	C		12--34--29	0.4533	0.4743	0.8073		3--15--12	0.5	0.455	0.7076
OVOC.OM1b	24715786	C	A		5--63--12	0.7875	0.4962	1.341e-07		2--31--1	0.9118	0.4996	1.929e-06
OVOC.OM1b	24722996	C	A		8--60--13	0.7407	0.4981	1.718e-05		1--33--1	0.9429	0.5	9.288e-08
OVOC.OM1b	25870141	C	A		7--40--32	0.5063	0.4499	0.3256		1--22--9	0.6875	0.4688	0.02015
OVOC.OM1b	25875430	G	A		8--42--22	0.5833	0.4811	0.09161		5--22--3	0.7333	0.4978	0.02506
OVOC.OM1b	25932865	G	A		0--16--73	0.1798	0.1636	1		1--10--25	0.2778	0.2778	1
OVOC.OM1b	26105799	T	C		0--54--34	0.6136	0.4254	7.477e-06		1--20--12	0.6061	0.4444	0.05762
OVOC.OM1b	27126615	G	A		2--53--31	0.6163	0.4431	0.0002249		0--23--11	0.6765	0.4477	0.005013
OVOC.OM1b	27343614	G	A		9--55--14	0.7051	0.4979	0.0005311		2--31--2	0.8857	0.5	6.387e-06
OVOC.OM1b	27346277	T	C		14--47--19	0.5875	0.498	0.1764		2--26--7	0.7429	0.4898	0.004836
OVOC.OM1b	27357307	A	G		4--65--12	0.8025	0.4951	2.164e-08		0--32--1	0.9697	0.4995	2.039e-08
OVOC.OM1b	27416247	T	A		6--65--19	0.7222	0.4896	1.039e-05		1--23--10	0.6765	0.465	0.01193
OVOC.OM1b	27426371	A	G		9--56--19	0.6667	0.4929	0.001871		0--29--7	0.8056	0.4811	5.423e-05
OVOC.OM2	822671	A	T		12--40--19	0.5634	0.4951	0.3383		4--19--7	0.6333	0.495	0.2646
OVOC.OM2	2389829	A	G		5--46--37	0.5227	0.4339	0.08411		3--23--10	0.6389	0.4811	0.08488
OVOC.OM2	3273538	A	G		1--78--12	0.8571	0.4927	8.599e-14		0--32--5	0.8649	0.4909	3.069e-06
OVOC.OM2	11828248	A	G		3--31--53	0.3563	0.3349	0.7519		0--8--28	0.2222	0.1975	1
OVOC.OM2	13431835	A	G		0--70--12	0.8537	0.4893	4.119e-13		0--31--4	0.8857	0.4935	1.922e-06
OVOC.OM2	17375161	A	T		1--45--40	0.5233	0.3972	0.002662		0--17--19	0.4722	0.3607	0.1555
OVOC.OM2	17406274	G	A		1--45--44	0.5	0.3859	0.005224		0--20--17	0.5405	0.3944	0.03698
OVOC.OM2	17826333	A	G		2--84--2	0.9545	0.5	5.806e-20		0--34--1	0.9714	0.4996	5.555e-09
OVOC.OM2	24343786	C	T		1--48--35	0.5714	0.4181	0.0005481		2--22--12	0.6111	0.4614	0.07908
OVOC.OM2	25338965	T	A		4--26--61	0.2857	0.3038	0.5031		1--13--20	0.3824	0.3439	1
OVOC.OM3	692935	C	A		2--42--31	0.56	0.4252	0.006761		1--23--6	0.7667	0.4861	0.00269
OVOC.OM3	942124	C	T		9--34--42	0.4	0.4246	0.6117		0--15--19	0.4412	0.3439	0.1668
OVOC.OM3	942127	G	A		1--50--40	0.5495	0.4082	0.0006635		0--22--12	0.6471	0.4377	0.00643
OVOC.OM3	2379850	A	G		2--52--24	0.6667	0.4602	5.949e-05		1--21--13	0.6	0.4412	0.05678
OVOC.OM3	3947787	C	T		2--11--71	0.131	0.1626	0.1179		0--1--30	0.03226	0.03174	1
OVOC.OM3	4215124	G	T		7--66--6	0.8354	0.4999	1.651e-09		3--24--6	0.7273	0.4959	0.01411
OVOC.OM3	4216815	T	C		4--63--21	0.7159	0.4813	5.337e-06		0--27--9	0.75	0.4688	0.0002909
OVOC.OM3	4224625	C	T		4--43--44	0.4725	0.4034	0.1266		1--24--10	0.6857	0.4669	0.01004
OVOC.OM3	8698814	C	T		0--28--52	0.35	0.2888	0.1112		0--11--23	0.3235	0.2712	0.5621
OVOC.OM3	8723944	G	T		6--70--10	0.814	0.4989	5.372e-09		5--27--4	0.75	0.4996	0.006528
OVOC.OM3	8899567	T	C		2--40--46	0.4545	0.375	0.08343		1--18--16	0.5143	0.4082	0.2197
OVOC.OM3	8957381	G	A		5--68--17	0.7556	0.4911	3.678e-07		1--30--6	0.8108	0.4909	0.0001239
OVOC.OM3	8972954	C	T		0--47--42	0.5281	0.3887	0.0002693		0--21--14	0.6	0.42	0.01543
OVOC.OM3	9021671	A	G		0--36--49	0.4235	0.3338	0.01791		1--21--11	0.6364	0.4541	0.05006
OVOC.OM3	9026554	A	G		0--44--45	0.4944	0.3722	0.001131		1--23--11	0.6571	0.4592	0.02368
OVOC.OM3	9037418	A	G		0--40--46	0.4651	0.3569	0.004559		1--21--13	0.6	0.4412	0.05678
OVOC.OM3	9041264	T	G		0--41--50	0.4505	0.3491	0.004878		1--21--14	0.5833	0.4348	0.06219
OVOC.OM3	9051736	G	A		0--45--44	0.5056	0.3778	0.0006108		1--23--13	0.6216	0.4474	0.02844
OVOC.OM3	12556276	T	C		4--69--14	0.7931	0.4934	8.338e-09		2--31--3	0.8611	0.4996	2.781e-05
OVOC.OM3	12558575	G	A		2--51--27	0.6375	0.4512	0.000176		0--24--7	0.7742	0.4745	0.0004994
OVOC.OM3	14172412	A	G		0--48--42	0.5333	0.3911	0.0002457		0--23--13	0.6389	0.4348	0.00622
OVOC.OM3	14222173	G	A		4--43--32	0.5443	0.4372	0.04022		2--14--18	0.4118	0.3893	1
OVOC.OM3	15420617	A	G		0--3--88	0.03297	0.03242	1		1--2--34	0.05405	0.1023	0.08161
OVOC.OM3	15472616	A	T		0--15--67	0.1829	0.1662	1		1--7--28	0.1944	0.2188	0.4337
OVOC.OM3	16245109	G	C		2--49--35	0.5698	0.4264	0.001991		0--22--13	0.6286	0.431	0.01398
OVOC.OM3	16254739	C	T		1--33--54	0.375	0.3186	0.1753		0--15--20	0.4286	0.3367	0.3043
OVOC.OM4	1888614	G	T		6--65--16	0.7471	0.4934	2.783e-06		2--26--8	0.7222	0.4861	0.00616
OVOC.OM4	2242968	T	G		1--71--11	0.8554	0.4927	1.677e-12		0--27--7	0.7941	0.4788	0.0001523
OVOC.OM4	3732036	A	T		0--43--47	0.4778	0.3636	0.002403		0--15--22	0.4054	0.3232	0.304
OVOC.OM4	5566648	A	T		3--78--9	0.8667	0.4978	3.114e-13		2--32--1	0.9143	0.4996	8.042e-07
OVOC.OM4	5573125	T	A		2--46--40	0.5227	0.4068	0.008409		2--27--6	0.7714	0.4935	0.001698
OVOC.OM4	5593913	T	G		10--28--33	0.3944	0.4475	0.3008		1--21--9	0.6774	0.4667	0.02114
OVOC.OM4	5600714	G	C		11--68--9	0.7727	0.4997	4.768e-07		0--31--3	0.9118	0.4961	1.169e-06
OVOC.OM4	6779194	T	A		1--31--59	0.3407	0.2969	0.2865		1--17--19	0.4595	0.3817	0.3933
OVOC.OM4	8283337	C	T		12--57--16	0.6706	0.4989	0.002305		2--30--4	0.8333	0.4985	0.0001288
OVOC.OM4	8309096	A	G		14--19--39	0.2639	0.4397	0.0009804		7--13--15	0.3714	0.4739	0.2808
OVOC.OM4	8364515	A	G		5--71--13	0.7978	0.496	8.433e-09		1--29--7	0.7838	0.4869	0.0004351
OVOC.OM4	8535984	T	C		2--40--46	0.4545	0.375	0.08343		0--11--24	0.3143	0.2649	0.5656
OVOC.OM4	9391628	A	G		2--66--19	0.7586	0.4809	2.791e-08		1--28--7	0.7778	0.4861	0.0004759
OVOC.OM4	9879035	C	T		0--16--64	0.2	0.18	1		1--15--20	0.4167	0.3607	0.6468
OVOC.OM4	10552923	A	G		2--54--30	0.6279	0.447	0.00019		1--25--8	0.7353	0.4788	0.003332
OVOC.OM4	12307027	C	T		2--83--4	0.9326	0.4997	3.97e-18		2--34--1	0.9189	0.4996	2.442e-07
OVOC.OM4	12908824	A	T		5--69--16	0.7667	0.4925	1.238e-07		3--29--3	0.8286	0.5	0.0001761
OVOC.OM4	12909207	G	A		6--42--38	0.4884	0.4308	0.3162		1--15--18	0.4412	0.375	0.6449
OVOC.OM4	12910198	T	G		3--57--15	0.76	0.4872	1.076e-06		4--23--2	0.7931	0.4976	0.002772
OVOC.OM4	12910367	T	C		11--53--21	0.6235	0.4931	0.02677		3--19--11	0.5758	0.4706	0.2836
OVOC.OM4	12922917	A	T		5--33--41	0.4177	0.3962	0.7798		4--10--19	0.303	0.3967	0.193
OVOC.OM4	12949329	G	T		3--72--16	0.7912	0.4898	1.873e-09		0--30--6	0.8333	0.4861	1.474e-05
OVOC.OM4	13027184	C	T		0--28--63	0.3077	0.2604	0.1175		0--13--24	0.3514	0.2896	0.565
OVOC.OM4	15179475	G	A		1--36--45	0.439	0.356	0.05782		1--9--21	0.2903	0.2919	1
OVOC.OM4	15187238	G	A		2--62--14	0.7949	0.4882	1.108e-08		0--23--9	0.7188	0.4604	0.001815
OVOC.OM4	15598240	G	A		0--28--61	0.3146	0.2651	0.1152		0--8--26	0.2353	0.2076	1
OVOC.OM4	15598246	C	T		0--33--58	0.3626	0.2969	0.03672		0--11--26	0.2973	0.2531	0.5733
OVOC.OM4	15599167	G	A		3--74--6	0.8916	0.4993	1.081e-13		0--30--2	0.9375	0.498	5.071e-07
OVOC.OM5	223916	T	G		0--21--69	0.2333	0.2061	0.5994		0--11--26	0.2973	0.2531	0.5733
OVOC.OM5	1061643	G	T		6--33--44	0.3976	0.3952	1		1--18--11	0.6	0.4444	0.1024
OVOC.OO.000004	24058	G	A		9--50--25	0.5952	0.4819	0.04263		3--25--4	0.7812	0.4995	0.003716
OVOC.OO.000004	24688	T	C		7--28--44	0.3544	0.3903	0.3963		2--17--10	0.5862	0.462	0.2389
OVOC.OO.000004	24789	G	A		0--25--58	0.3012	0.2558	0.1973		0--15--18	0.4545	0.3512	0.16
OVOC.OO.000004	27974	T	C		5--39--40	0.4643	0.4132	0.426		1--20--12	0.6061	0.4444	0.05762
OVOC.OO.000004	30304	G	A		5--61--21	0.7011	0.4831	4.297e-05		3--29--4	0.8056	0.4996	0.0005846
OVOC.OO.000055	15617	C	T		5--34--40	0.4304	0.4019	0.7788		2--13--17	0.4062	0.3901	1
OVOC.OO.000086	4842	T	C		4--46--32	0.561	0.4417	0.02301		2--19--13	0.5588	0.4477	0.2538
OVOC.OO.000086	8592	A	G		13--46--19	0.5897	0.497	0.1699		5--21--7	0.6364	0.4982	0.1704
OVOC.OO.000086	9629	T	A		2--64--12	0.8205	0.4918	1.467e-09		1--31--3	0.8857	0.4984	4.836e-06
OVOC.OO.000086	11404	G	A		4--60--25	0.6742	0.4722	4.955e-05		2--26--9	0.7027	0.4821	0.01458
OVOC.OO.000091	8721	C	T		9--51--23	0.6145	0.4858	0.02371		2--24--10	0.6667	0.4753	0.03291
OVOC.OO.000108	5020	G	T		1--54--29	0.6429	0.4444	1.947e-05		0--21--13	0.6176	0.4269	0.01384
OVOC.OO.000108	7874	C	T		0--57--31	0.6477	0.438	1.136e-06		0--28--8	0.7778	0.4753	0.0002005
OVOC.OO.000111	7079	C	T		0--10--75	0.1176	0.1107	1		1--3--29	0.09091	0.14	0.1502
OVOC.OO.000165	4193	A	G		0--62--13	0.8267	0.485	6.148e-11		0--28--5	0.8485	0.4885	2.874e-05
